## References

- 1 Dunsmuir WD, Gordon EM: The history of circumcision. *BJU Int* 1999;83(suppl 1):1–12.
- 2 Kaplan GW: Complications of circumcision. *Urol Clin North Am* 1983;10:543–549.
- 3 Leitch IOW: Circumcision: a continuing enigma. *Aust Pediatr J* 1970;6:59–65.
- 4 Ben Chaim J, Livne PM, Binyamini J, et al: Complications of circumcision in Israel: a one year multicenter survey. *Isr Med Assoc J* 2005;7:368–370.
- 5 MacCarthy D, Douglas JW, Mogford C: Circumcision in a national sample of 4-year-old children. *Br Med J* 1952;2:755–756.
- 6 Fraser IA, Allen MJ, Bagshaw PF, et al: A randomized trial to assess childhood circumcision with the Plastibell device compared to a conventional dissection technique. *Br J Surg* 1981;68:593–595.
- 7 Patel H: The problem of routine circumcision. *Can Med Assoc J* 1966;95:576–581.
- 8 Williams N, Kapila L: Complications of circumcision. *Br J Surg* 1993;80:1231–1236.
- 9 Gee WF, Ansell JS: Neonatal circumcision: a ten year overview with comparison of the Gomco clamp and the Plastibell device. *Pediatrics* 1976;58:824–827.
- 10 Wiswell TE, Geschke DW: Risks for circumcision during the first month of life compared with those for uncircumcised boys. *Pediatrics* 1989;83:1011–1015.
- 11 Wynder EL, Licklider SD: The question of circumcision. *Cancer* 1960;13:442–445.
- 12 Van Howe RS: Variability in penile appearance and penile findings: a prospective study. *Br J Urol* 1997;80:776–782.
- 13 Breuer GS, Walfisch S: Circumcision complications and indications for ritual recircumcision. Clinical experience and review of the literature. *Isr J Med Sci* 1987;23:252–256.
- 14 Goldman R: The psychological impact of circumcision. *BJU Int* 1999;83(suppl 1):93–102.
- 15 Blalock HJ, Vemulakonda V, Ritchey ML, Ribbeck M: Outpatient management of phimosis following newborn circumcision. *J Urol* 2003;169:2332–2334.

## Corrigendum

Please be informed that the authors Sava Micic, Cane Tulic and Tatjana Pekmezovic wish to be excluded from the list of authors of the following paper published in this journal:

Dragicevic S, et al: Evaluation of health-related quality of life in patients with prostate cancer after treatment with radical retropubic prostatectomy and permanent prostate brachytherapy. *Urol Int* 2010;85:173–179.
